# Supplementary material for: Retention time of lakes in the Larsemann Hills oasis, East Antarctica
Source: Copernicus journal article supplement (doi:10.5194/tc-15-2667-2021), 2021-06-14
Supplement: Supplementary file 1 [file tc-15-2667-2021-supplement.zip]

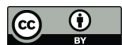

## *Supplement of*

# **Retention time of lakes in the Larsemann Hills oasis, East Antarctica**

**Elena Shevnina et al.**

*Correspondence to:* Elena Shevnina ([elena.shevnina@fmi.fi](mailto:elena.shevnina@fmi.fi))

- [tc-15-2667-2021-supplement-title-page.pdf](#)
- [Supplement\\_Shevnina\\_etal2021.xlsx](#)

The copyright of individual parts of the supplement might differ from the article licence.
